# Supplementary material for: Reproducible computational biology experiments with SED-ML - The Simulation Experiment Description Markup Language
Source: Springer Nature journal article supplement (doi:10.1186/1752-0509-5-198), 2011-12-01

Biological publication repository

Model database

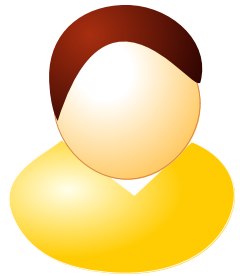

SED-ML

look up

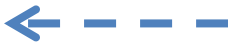

read

load model

export & store SED-ML

J. theor. Biol. (1999) 198, 445–459  
 Article No. JTB19992024, available online at <http://www.elsevier.com/locate/jtbi>

**Chaos and Bifurcations in a Model for Circadian Oscillations of the PER and TIM Proteins in *Drosophila***  
 Jean-Christophe Leloup and Albert Goldbeter\*

Unité de Chronobiologie Théorique, Faculté des Sciences Université Libre de Bruxelles, Campus Plaine, C.P. 231, B-1050 Bruxelles, Belgium  
 (Received on 13 July 1998, Accepted in revised form on 2 February 1999)

In *Drosophila*, circadian oscillations at the levels of two proteins, PER and TIM, result from the negative feedback exerted by a PER-TIM complex on the expression of the *per* and *tim* genes which code for these two proteins. On the basis of these experimental observations, we have recently proposed a theoretical model for circadian oscillations of the PER and TIM proteins in *Drosophila*, that is robust to constant environmental conditions. This model is capable of generating autonomous circadian oscillations. In other parameter regimes, the model can also display bistability. In the coexistence between two stable regimes of one cycle oscillations, we explore the occurrence of chaos and bifurcations by means of bifurcation diagrams and locate the different domains of complex oscillatory behavior in parameter space. The relative stability of these domains is then studied as to its possible physiological significance of chaos and bifurcations in regard to circadian rhythm generation. Beyond the particular context of circadian rhythms we discuss the results on the stability of other mechanisms underlying chaos and complexity in regulatory biological systems.  
 © 1999 Academic Press

**1. Introduction**  
 Circadian oscillations, of about 24 hr period, occur in nearly all living organisms and are among the most conspicuous biological rhythms. Important insights into the molecular mechanisms underlying circadian rhythm generation have been gained from the study of organisms such as *Drosophila* (Konopka & Benzer, 1971; Hall & Rosbash, 1982; Bradley et al., 1993, 1994, 1995; Rosbash, 1995) and *Neurospora crassa* (1996; Conradi et al., 1997). In *Drosophila*, circadian oscillations in the levels of two genes, PER and TIM, result from the negative feedback exerted by a PER-TIM complex on the

expression of the *per* and *tim* genes which code for the two proteins (Hartwig-Engel et al., 1996; Lee et al., 1996, 1999; Sherr et al., 1996; Zeng et al., 1996). The *per* and *tim* genes have recently been found to interact (Shaw et al., 1995; Lee et al., 1997; Kake et al., 1998; Zylka et al., 1998), including *per*. This suggests that the circadian clock mechanism might be conserved at least partly, if not entirely, from *Drosophila*, to mammals.  
 Based on these experimental observations, we have recently proposed a theoretical model for circadian oscillations of the PER and TIM proteins in *Drosophila* (Leloup & Goldbeter, 1998), which is a previous version based on regulation by PER alone (Goldbeter, 1995, 1996). The extended model accounts for a number of experimental observations such as the

\*After to whom correspondence should be addressed.  
 E-mail: goldbeter@ulb.ac.be

0022-2519/99/1945-15 \$20.00 © 1999 Academic Press

apply changes

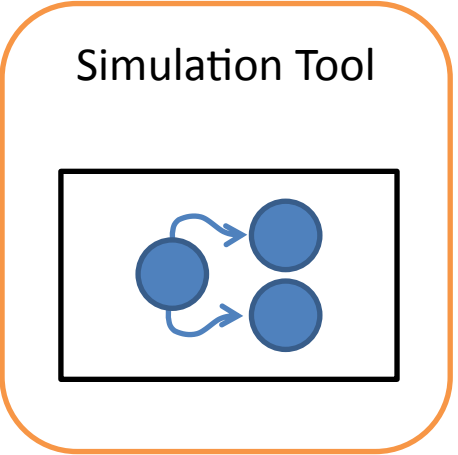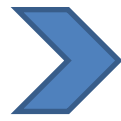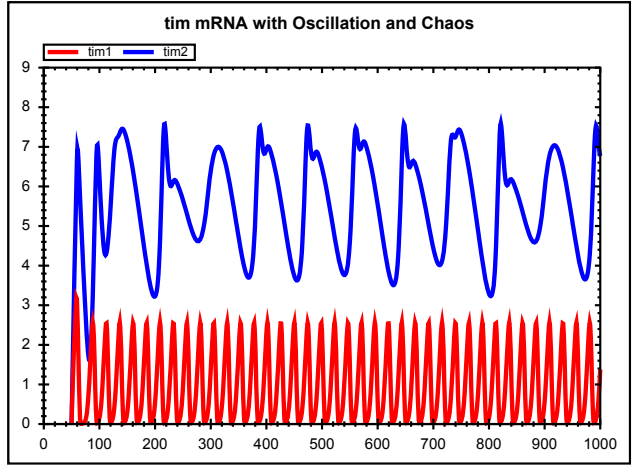

Supplement: 12918_2011_839_MOESM2_ESM.pdf [file 12918_2011_839_MOESM2_ESM.pdf]
