# Supplementary material for: Reproducible computational biology experiments with SED-ML - The Simulation Experiment Description Markup Language
Source: Springer Nature journal article supplement (doi:10.1186/1752-0509-5-198), 2011-12-01

Models

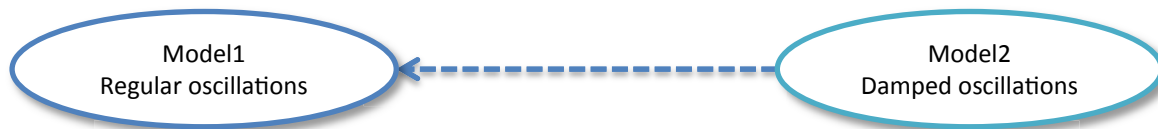

Simulations

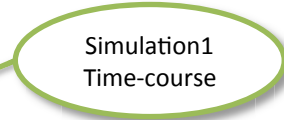

Tasks

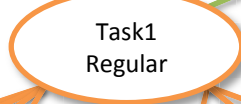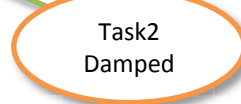

Data

Generators

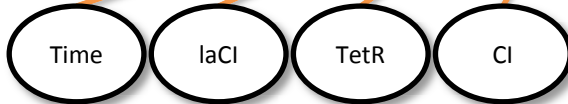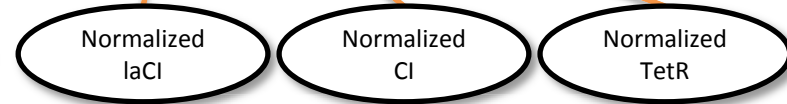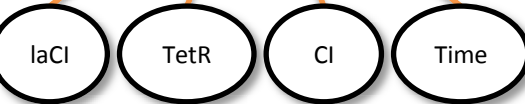

Outputs

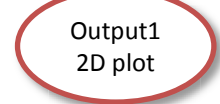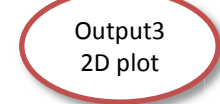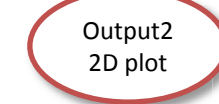

Supplement: 12918_2011_839_MOESM4_ESM.pdf [file 12918_2011_839_MOESM4_ESM.pdf]
